# Supplementary material for: Cryo-Induced Cellulose-Based Nanogel from Elaeis guineensis for Antibiotic Delivery Platform
Source: MDPI journal article supplement (doi:10.3390/ijms24021230), 2023-01-08
Supplement: s1 [file s1]

# **Cryo-Induced Cellulose-Based Nanogel from *Elaeis guineensis* for Antibiotic Delivery Platform**

**Tasnim Hajidariyor <sup>1</sup>, Nutchanon Nuntawad <sup>1</sup>, Panadda Somsaen <sup>1</sup>, Raninnart Prukdamrongchai <sup>1</sup>, Harit Cherdchoo <sup>1</sup>, Pattaraporn Posoknistakul <sup>1</sup>, Pongtanawat Khemthong <sup>2</sup>, Wanwitoo Wanmolee <sup>2</sup>, Pariyapat Arjfuk <sup>3</sup>, Pisut Pongchaikul <sup>3</sup>, Navadol Laosiripojana <sup>4</sup>, Kevin C.-W. Wu <sup>5,6,7,8,9</sup> and Chularat Sakdaronnarong <sup>1,\*</sup>**

<sup>1</sup> Department of Chemical Engineering, Faculty of Engineering, Mahidol University, Nakorn Pathom 73170, Thailand

<sup>2</sup> National Nanotechnology Center (NANOTEC), National Science and Technology Development Agency (NSTDA), Pathum Thani 12120, Thailand

<sup>3</sup> Chakri Naruebodindra Medical Institute, Faculty of Medicine Ramathibodi Hospital, Mahidol University, Samut Prakarn 10540, Thailand

<sup>4</sup> The Joint Graduate School of Energy and Environment, King Mongkut's University of Technology Thonburi, Bangkok 10140, Thailand

<sup>5</sup> Department of Chemical Engineering, National Taiwan University, Taipei 10617, Taiwan

<sup>6</sup> Center of Atomic Initiative for New Materials (AI-MAT), National Taiwan University, Taipei 10617, Taiwan

<sup>7</sup> International Graduate Program of Molecular Science and Technology, National Taiwan University (NTU-MST), Taipei 10617, Taiwan

<sup>8</sup> Department of Chemical Engineering and Materials Science, Yuan Ze University, Taoyuan 320315, Taiwan

<sup>9</sup> Yonsei Frontier Lab, Yonsei University, Seoul 03722, Republic of Korea

\* Correspondence: chularat.sak@mahidol.ac.th



**Table S1.** Chemical composition of the matrices and crosslinkers for cellulose/CMC hydrogels synthesis

| Hydrogels        | Matrices                 |                          | Crosslinkers   |          |            |
|------------------|--------------------------|--------------------------|----------------|----------|------------|
|                  | CMC Sol <sup>n</sup> (g) | CEL Sol <sup>n</sup> (g) | $\beta$ CD (g) | ECH (mL) | PEGDE (mL) |
| E-CMC-CEL55      | 15                       | 15                       | -              | 3        | -          |
| E-CMC-CEL64      | 18                       | 12                       | -              | 3        | -          |
| E-CMC-CEL73      | 21                       | 9                        | -              | 3        | -          |
| E-CMC-CEL82      | 24                       | 6                        | -              | 3        | -          |
| E-CMC-CEL91      | 27                       | 3                        | -              | 3        | -          |
| E-CMCCEL         | 27                       | 3                        | -              | 3        | -          |
| E-CEL            | -                        | 30                       | -              | 3        | -          |
| E-CEL $\beta$ CD | -                        | 27                       | 3              | 3        | -          |
| E-CMC            | 30                       | -                        | -              | 3        | -          |
| E-CMC $\beta$ CD | 27                       | -                        | 3              | 3        | -          |
| P-CMCCEL         | 27                       | 3                        | -              | -        | 3          |
| P-CEL            | -                        | 30                       | -              | -        | 3          |
| P-CEL $\beta$ CD | -                        | 27                       | 3              | -        | 3          |
| P-CMC            | 30                       | -                        | -              | -        | 3          |
| P-CMC $\beta$ CD | 27                       | -                        | 3              | -        | 3          |



**Table S2.** Cellulose recovery from hydrothermal fractionation, cellulose yield and cellulose purity after bleaching

| Hydrothermal fractionation | Chemical composition (wt%) |               |        |       |       | After hydrothermal fractionation |                           |                    |                        | After bleaching (10 times) |                      |
|----------------------------|----------------------------|---------------|--------|-------|-------|----------------------------------|---------------------------|--------------------|------------------------|----------------------------|----------------------|
|                            | Cellulose                  | Hemicellulose | Lignin | Ash   | Other | Solid yield (%)                  | Hemicellulose removal (%) | Lignin removal (%) | Cellulose recovery (%) | Cellulose yield (%)        | Cellulose purity (%) |
| Raw EFB                    | 39.50                      | 23.02         | 11.71  | 1.10  | 24.67 | 100                              | na                        | na                 | na                     | na                         | na                   |
| 180 °C, 3 MPa, 1h          | 58.70                      | 2.17          | 17.63  | 13.51 | 7.7   | 52.27                            | 95.07                     | 21.30              | 77.68                  | 72.83                      | 99.24                |
| 200 °C, 3 MPa, 1h          | 57.68                      | 2.18          | 22.53  | 11.60 | 6.02  | 39.12                            | 96.30                     | 24.73              | 57.13                  | 51.92                      | 92.88                |
| 220 °C, 3 MPa, 1h          | 51.20                      | 3.51          | 31.17  | 8.83  | 5.29  | 28.91                            | 95.59                     | 23.05              | 37.47                  | 30.11                      | 85.65                |

**Note:** na is not applicable.



**Table S3.** Whiteness of cellulose characterized by IMAGE J

| Condition         | Number of bleaching | L*   | a    | b     | $\Delta E$ |
|-------------------|---------------------|------|------|-------|------------|
| 180 °C, 3 MPa, 1h | Unbleached          | 3.7  | 1.0  | 1.3   | 4.0        |
|                   | 1                   | 3.9  | 1.2  | 1.6   | 4.4        |
|                   | 2                   | 5.3  | 3.3  | 2.2   | 6.6        |
|                   | 3                   | 7.3  | 4.0  | 3.0   | 8.8        |
|                   | 4                   | 7.4  | 4.4  | 3.3   | 9.2        |
|                   | 5                   | 29.7 | 14.3 | 25.3  | 41.6       |
|                   | 6                   | 30.5 | 15.2 | 26.1  | 42.9       |
|                   | 7                   | 52.0 | -2.0 | 9.3   | 52.9       |
|                   | 8                   | 54.2 | 6.6  | 8.4   | 55.2       |
|                   | 9                   | 57.6 | 6.9  | 2.5   | 58.1       |
|                   | 10                  | 59.0 | 7.3  | -16.0 | 61.6       |
| 200 °C, 3 MPa, 1h | Unbleached          | 4.3  | 1.3  | -0.3  | 4.5        |
|                   | 1                   | 12.3 | 2.5  | 2.0   | 12.7       |
|                   | 2                   | 14.6 | 5.1  | 8.9   | 17.8       |
|                   | 3                   | 15.7 | 6.3  | 11.0  | 20.2       |
|                   | 4                   | 17.1 | 7.0  | 11.6  | 21.8       |
|                   | 5                   | 17.7 | 8.0  | 12.3  | 23.0       |
|                   | 6                   | 18.9 | 9.0  | 15.6  | 26.1       |
|                   | 7                   | 27.0 | 5.3  | 17.0  | 32.3       |
|                   | 8                   | 30.5 | 5.1  | 16.0  | 34.8       |
|                   | 9                   | 31.8 | 5.6  | 17.1  | 36.5       |
|                   | 10                  | 34.0 | 6.0  | 19.7  | 39.8       |
| 220 °C, 3 MPa, 1h | Unbleached          | 3.7  | 0.3  | 1.0   | 3.8        |
|                   | 1                   | 4.1  | 1.2  | 1.9   | 4.7        |
|                   | 2                   | 6.2  | 2.2  | 0.6   | 6.6        |
|                   | 3                   | 7.0  | 2.3  | -1.7  | 7.6        |
|                   | 4                   | 8.1  | 3.3  | 3.4   | 9.4        |



|                    |    |      |      |      |      |
|--------------------|----|------|------|------|------|
|                    | 5  | 8.7  | 5    | 6.7  | 12.1 |
|                    | 6  | 15.2 | 7.1  | 7.9  | 18.5 |
|                    | 7  | 19.7 | 9    | 9.7  | 23.7 |
|                    | 8  | 20.3 | 9.5  | 10.5 | 24.8 |
|                    | 9  | 20.9 | 10.4 | 11.3 | 25.9 |
|                    | 10 | 21.3 | 11.3 | 12   | 26.9 |
| Standard cellulose | -  | 51.3 | 5.3  | 4.3  | 51.8 |

**Table S4.** Degree of substitution and whiteness of synthesized CMC from EFB derived cellulose at different CMC synthesis conditions

| CMC code | Parameters  |                              |                                 | Responses                   |      |      |     |      |
|----------|-------------|------------------------------|---------------------------------|-----------------------------|------|------|-----|------|
|          | NaOH (%w/v) | Monochloroacetic acid (%w/v) | Etherification Temperature (°C) | Degree of substitution (DS) | L*   | a    | b   | ΔE   |
| CMC 1    | 15          | 2                            | 50                              | 0.71 ± 0.02                 | 78.9 | 3.6  | 5.4 | 79.2 |
| CMC 2    | 15          | 4                            | 50                              | 0.56 ± 0.02                 | 82.3 | 11.1 | 5.2 | 83.2 |
| CMC 3    | 15          | 2                            | 70                              | 0.75 ± 0.01                 | 79.7 | 10.9 | 7.1 | 80.8 |
| CMC 4    | 15          | 4                            | 70                              | 0.43 ± 0.03                 | 88.8 | 9.5  | 6.8 | 89.6 |
| CMC 5    | 25          | 2                            | 50                              | 0.61 ± 0.01                 | 77.3 | 12.6 | 7.6 | 78.7 |
| CMC 6    | 25          | 4                            | 50                              | 0.45 ± 0.02                 | 84.0 | 17.8 | 8.6 | 86.3 |
| CMC 7    | 25          | 2                            | 70                              | 0.61 ± 0.02                 | 74.6 | 15.4 | 6.2 | 76.4 |
| CMC 8    | 25          | 4                            | 70                              | 0.65 ± 0.01                 | 78.1 | 15.8 | 9.5 | 80.2 |
| CMC 9    | 20          | 3                            | 60                              | 0.59 ± 0.02                 | 80.7 | 14.4 | 9.1 | 82.5 |
| CMC 10   | 20          | 3                            | 60                              | 0.60 ± 0.01                 | 79.2 | 15.0 | 8.2 | 81.0 |
| CMC 11   | 20          | 3                            | 60                              | 0.59 ± 0.02                 | 82.1 | 13.9 | 8.6 | 83.7 |



**Table S5.** ANOVA of Quadratic Regression of Degree of Substitution (DS) from CMC synthesis

| <i>Regression Statistics</i> |          |
|------------------------------|----------|
| Multiple R                   | 0.899832 |
| R Square                     | 0.809697 |
| Adjusted R Square            | 0.365657 |
| Standard Error               | 0.075673 |
| Observations                 | 11       |

| ANOVA      |           |           |           |          |                       |
|------------|-----------|-----------|-----------|----------|-----------------------|
|            | <i>df</i> | <i>SS</i> | <i>MS</i> | <i>F</i> | <i>Significance F</i> |
| Regression | 7         | 0.073094  | 0.010442  | 1.823477 | 0.335047              |
| Residual   | 3         | 0.017179  | 0.005726  |          |                       |
| Total      | 10        | 0.090273  |           |          |                       |

|                         | <i>Coefficients</i> | <i>Standard Error</i> | <i>t Stat</i> | <i>P-value</i> | <i>Lower 95%</i> | <i>Upper 95%</i> | <i>Lower 95.0%</i> | <i>Upper 95.0%</i> |
|-------------------------|---------------------|-----------------------|---------------|----------------|------------------|------------------|--------------------|--------------------|
| Intercept ( $\beta_0$ ) | 4.497708            | 2.628125              | 1.711376      | 0.185535       | -3.86616         | 12.86157         | -3.86616           | 12.86157           |
| $\beta_3$               | -0.12675            | 0.088148              | -1.43793      | 0.246023       | -0.40727         | 0.153775         | -0.40727           | 0.153775           |
| $\beta_{12}$            | 0.00875             | 0.005351              | 1.635244      | 0.200513       | -0.00828         | 0.025779         | -0.00828           | 0.025779           |
| $\beta_{13}$            | 0.000725            | 0.000535              | 1.354917      | 0.268444       | -0.00098         | 0.002428         | -0.00098           | 0.002428           |
| $\beta_{23}$            | 0.000375            | 0.002675              | 0.140164      | 0.897412       | -0.00814         | 0.008889         | -0.00814           | 0.008889           |
| $\beta_{11}$            | -0.00183            | 0.000907              | -2.01149      | 0.137784       | -0.00471         | 0.001062         | -0.00471           | 0.001062           |
| $\beta_{22}$            | -0.04521            | 0.032463              | -1.39263      | 0.257997       | -0.14852         | 0.058102         | -0.14852           | 0.058102           |
| $\beta_{33}$            | 0.000938            | 0.000675              | 1.389722      | 0.258787       | -0.00121         | 0.003084         | -0.00121           | 0.003084           |

Note: Regression model is  $y = \beta_0 + \beta_3 x_3 + \beta_{12} x_1 x_2 + \beta_{13} x_1 x_3 + \beta_{23} x_2 x_3 + \beta_{11} x_1^2 + \beta_{22} x_2^2 + \beta_{33} x_3^2$ , when y is degree of substitution (DS) of synthesized CMC,  $x_1$  is NaOH concentration (wt%),  $x_2$  is monochloroacetic acid (MCA) (% w/v), and  $x_3$  is etherification temperature ( $^{\circ}\text{C}$ ).



**Table S6.** ANOVA of Quadratic Regression of Whiteness ( $\Delta E$ ) from CMC synthesis

| <i>Regression Statistics</i> |          |
|------------------------------|----------|
| Multiple R                   | 0.951587 |
| R Square                     | 0.905517 |
| Adjusted R Square            | 0.685057 |
| Standard Error               | 2.074046 |
| Observations                 | 11       |

| ANOVA      |           |           |           |          |                       |
|------------|-----------|-----------|-----------|----------|-----------------------|
|            | <i>df</i> | <i>SS</i> | <i>MS</i> | <i>F</i> | <i>Significance F</i> |
| Regression | 7         | 123.6805  | 17.66864  | 4.107393 | 0.136529              |
| Residual   | 3         | 12.905    | 4.301667  |          |                       |
| Total      | 10        | 136.5855  |           |          |                       |

|                         | <i>Coefficients</i> | <i>Standard Error</i> | <i>t Stat</i> | <i>P-value</i> | <i>Lower 95%</i> | <i>Upper 95%</i> | <i>Lower 95.0%</i> | <i>Upper 95.0%</i> |
|-------------------------|---------------------|-----------------------|---------------|----------------|------------------|------------------|--------------------|--------------------|
| Intercept ( $\beta_0$ ) | -33.375             | 72.03174              | -0.46334      | 0.674668       | -262.612         | 195.8621         | -262.612           | 195.8621           |
| $\beta_3$               | 3.80625             | 2.415952              | 1.575466      | 0.21323        | -3.88239         | 11.49489         | -3.88239           | 11.49489           |
| $\beta_{12}$            | -0.035              | 0.146657              | -0.23865      | 0.826749       | -0.50173         | 0.431729         | -0.50173           | 0.431729           |
| $\beta_{13}$            | -0.041              | 0.014666              | -2.79564      | 0.068099       | -0.08767         | 0.005673         | -0.08767           | 0.005673           |
| $\beta_{23}$            | 0.0125              | 0.073329              | 0.170466      | 0.875492       | -0.22086         | 0.245864         | -0.22086           | 0.245864           |
| $\beta_{11}$            | 0.057125            | 0.024867              | 2.297227      | 0.105256       | -0.02201         | 0.136263         | -0.02201           | 0.136263           |
| $\beta_{22}$            | 0.495833            | 0.889734              | 0.557283      | 0.616213       | -2.3357          | 3.327363         | -2.3357            | 3.327363           |
| $\beta_{33}$            | -0.02524            | 0.018489              | -1.36509      | 0.265583       | -0.08408         | 0.033602         | -0.08408           | 0.033602           |

Note: Regression model is  $y = \beta_0 + \beta_3 x_3 + \beta_{12} x_1 x_2 + \beta_{13} x_1 x_3 + \beta_{23} x_2 x_3 + \beta_{11} x_1^2 + \beta_{22} x_2^2 + \beta_{33} x_3^2$ , when y is whiteness ( $\Delta E$ ) of synthesized CMC,  $x_1$  is NaOH concentration (wt%),  $x_2$  is monochloroacetic acid (MCA) (% w/v), and  $x_3$  is etherification temperature ( $^{\circ}\text{C}$ ).



**Table S7.** Reaction conditions and chemical composition of cryo-induced cellulose-based hydrogels

| Sample code | Cell Soln : CMC Soln<br>15 g : 15 g | Epichlorohydrin<br>(mL) | Successful<br>Cryogelation |
|-------------|-------------------------------------|-------------------------|----------------------------|
| CMC-E1      | Cellulose + CMC                     | 1                       | ×                          |
| CMC-E3      | Cellulose + CMC                     | 3                       | ✓                          |
| CMC-E5      | Cellulose + CMC                     | 5                       | ✓                          |
| HEC-E1      | Cellulose + HEC                     | 1                       | ×                          |
| HEC-E3      | Cellulose + HEC                     | 3                       | ✓                          |
| HEC-E5      | Cellulose + HEC                     | 5                       | ×                          |
| STA-E1      | Cellulose + Starch                  | 1                       | ×                          |
| STA-E3      | Cellulose + Starch                  | 3                       | ×                          |
| STA-E5      | Cellulose + Starch                  | 5                       | ×                          |



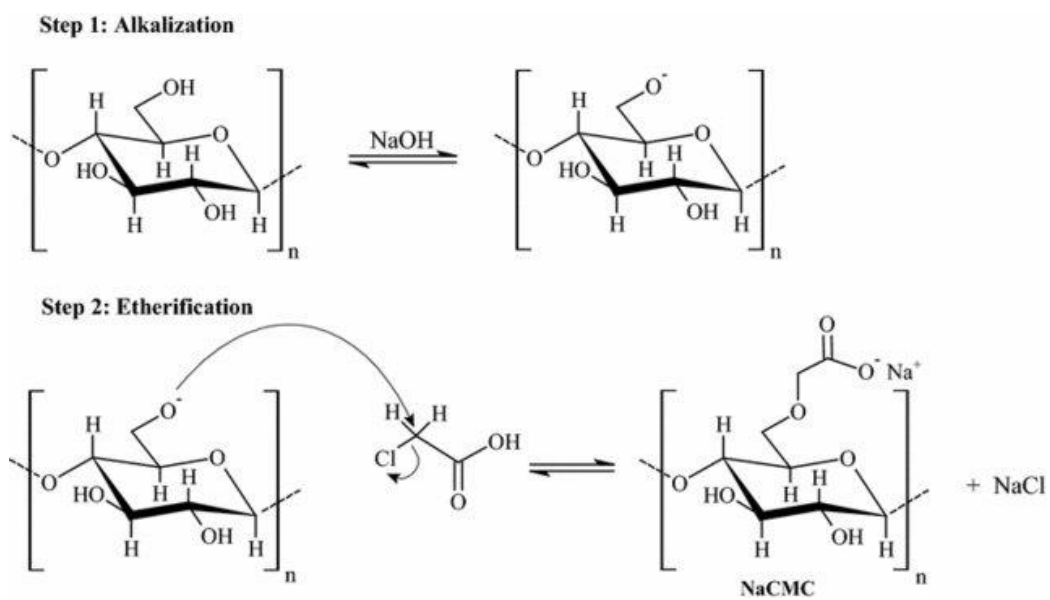

**Scheme S1.** CMC synthesis from cellulose: Step 1 Alkalization or Mercerization and Step 2 Etherification.



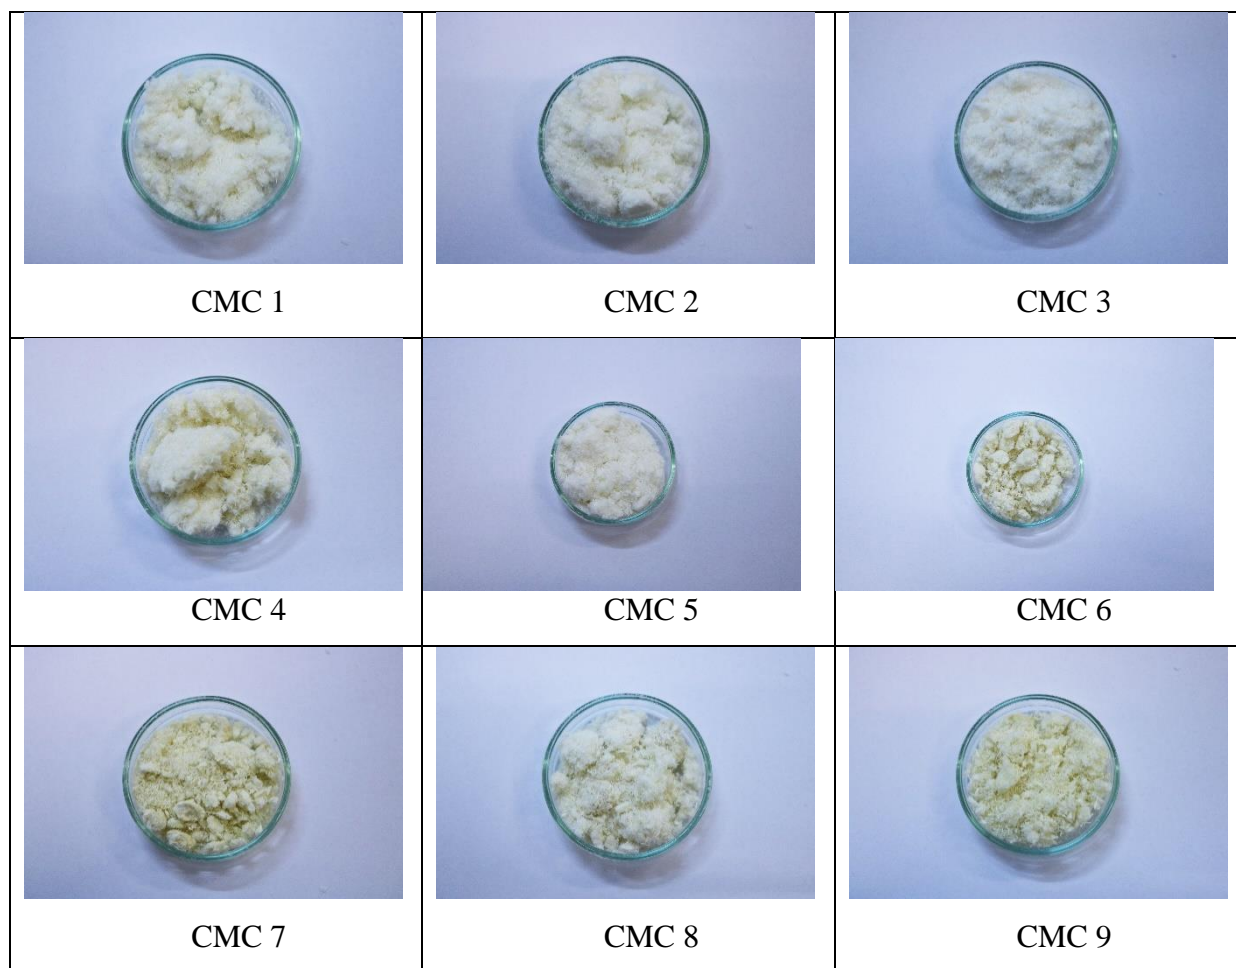

**Figure S1.** CMC from EFB derived cellulose from different synthesis conditions.



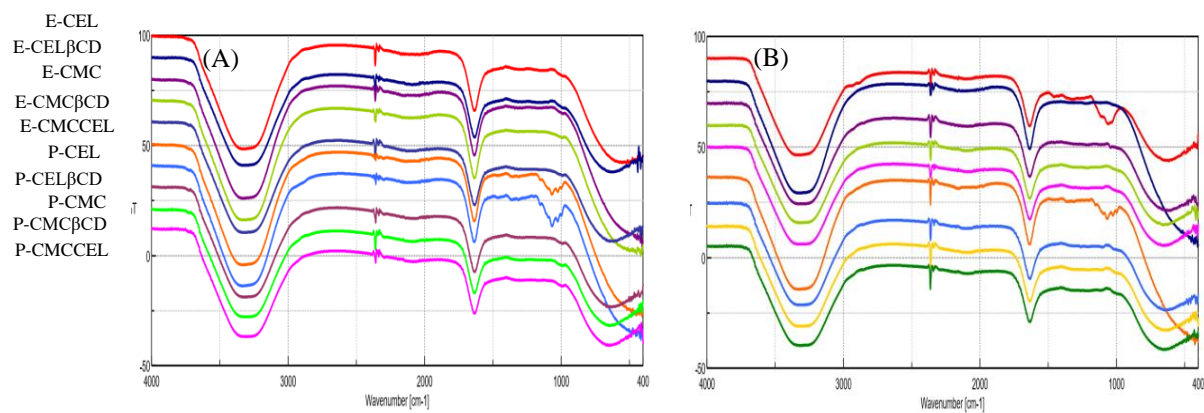

**Figure S2.** FT-IR spectra of the hydrogels using ECH and PEGDE as a cross-linker after loading of in  $0.25 \text{ mg mL}^{-1}$  Tetracycline A) at pH 7.4, and B) at pH 3.2 at  $25^\circ\text{C}$  for 3 days.



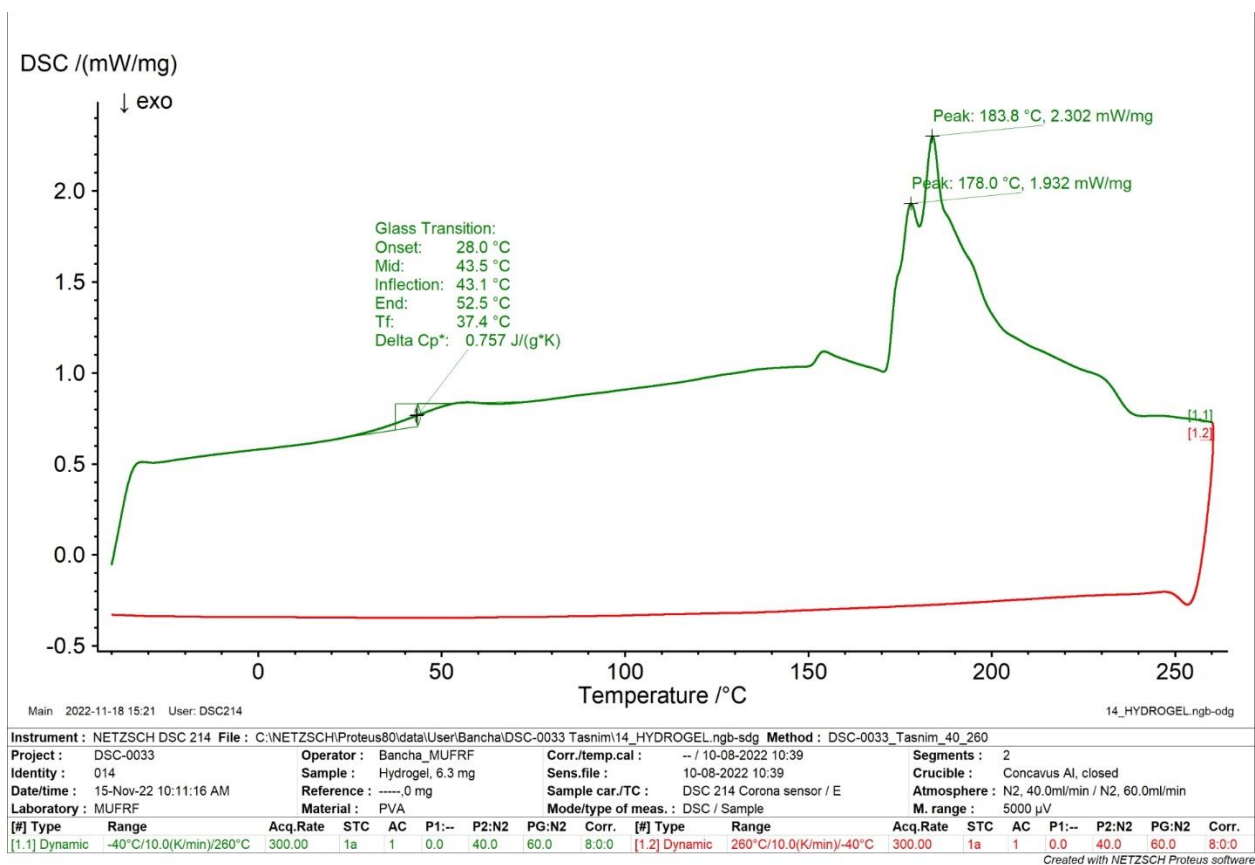

**Figure S3.** Differential Scanning Calorimetry (DSC) of E-CMC-CEL hydrogel.



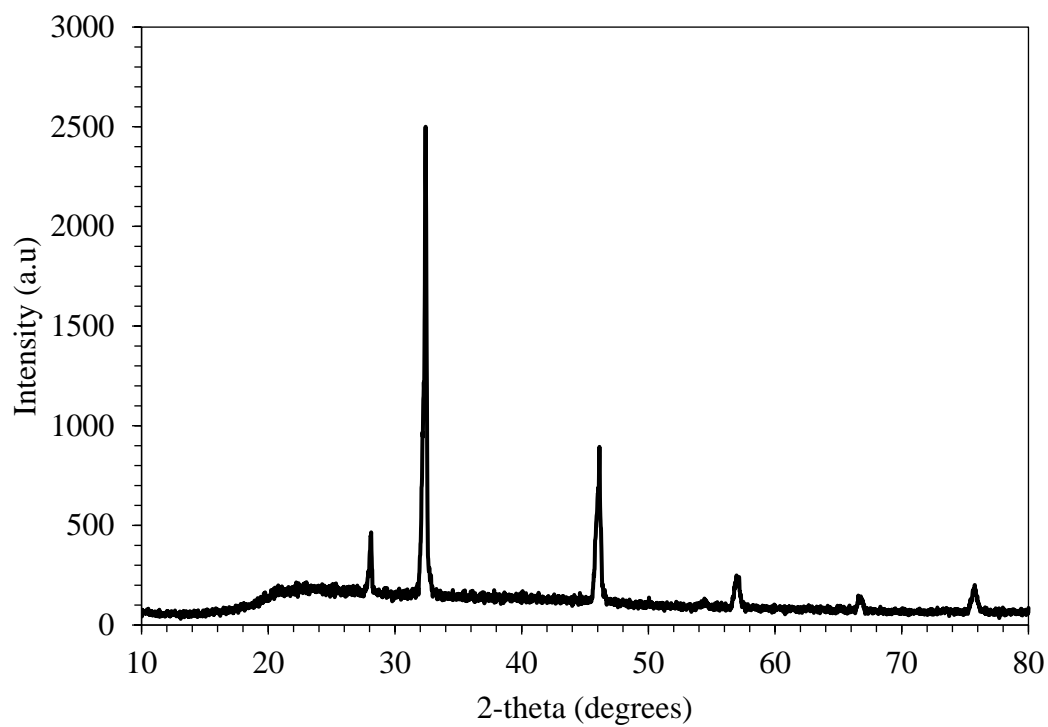

**Figure S4.** XRD diffraction pattern of E-CMC-CEL hydrogel after freeze drying.
